# Supplementary material
Source: Elsevier journal article supplement (https://www.sciencedirect.com/science/article/pii/S0001731014000702)
Supplement: mmc1 [file S0001731014000702:mmc1.docx]

ANEXO

AMDF: A*rithmetic Mean of Desirability Functions*

APs: Artritis Psoriásica

AR: Artritis Reumatoide

BASDAI: *Bath AS Disease Activity Index*

BASFI: *Bath AS Functional Index*

BASRI: *Bath Ankylosing Spondylitis Radiology Index*

BNP: B-type Natriuretic Peptide

COMP: *Cartilage Oligomeric Matrix Protein*

# CPDAI: *Composite Psoriatic Disease Activity Index*

DAS: *Disease Activity Score*

DLQI: *Dermatology Life Quality Index*

EARP: *Early Arthritis for Psoriatic Patients*

EQ5D: *EuroQoL 5 Dimension*

GWAS: *Genome Wide Assay Scan*

FAME: Fármaco Modificador de la Enfermedad

FR: Factor Reumatoide

HAQ*: Health Assessment Questionnaire*

IMC: Índice de Masa Corporal

JAK: Janus Quinasa

LEI: *Leeds Enthesitis Index*

# MASES: *Maastricht Ankylosing Spondylitis Enthesis Score*

MDA: *Minimal Disease Activity*

MTX: Metotrexato

NAPSI: *Nail Psoriasis Severity Index*

NF-κB: Factor Nuclear- κB

OC: Osteoclasto

OPG: Osteoprotegerina

PASDAS*: Psoriatic Arthritis Disease Activity Score*

PASE: *Psoriatic Arthritis Screening Evaluation*

# PASI: *Psoriasis Area and Severity Index*

PASRI: *Psoriatic Arthritis Spondylitis Radiology Index*

PCR: Proteina C Reactiva

PEST: *Psoriasis Epidemiology Screening Tool*

PGA: *Physician Global Assessment*

# PsACR: *Psoriatic Arthritis Response Criteria*

# PsAJAI: *Psoriatic Arthritis Joint Activity Index*

PsAQol: *Psoriatic Arthritis Quality of Life*

RANKL: *Receptor Activator of Nuclear Factor-κB Ligand*

RMN: Resonancia Magnética Nuclea

# SPARCC: *Spondyloarthritis Research Consortium of Canada*

SCORE: *Systematic Coronary Risk Evaluation*

SPI: *Simplified Psoriasis Index*

TC: Tomografía Computerizada

ToPAS: *Toronto Psoriatic Arthritis Screen*

VSG: Velocidad de Sedimentación Globular
